# Supplementary material
Source: HighWire-hosted journal article supplement (http://thorax.bmjjournals.com/highwire/filestream/173862/field_highwire_adjunct_files/0/625395webonlyfig1.pdf)

# Figure 1

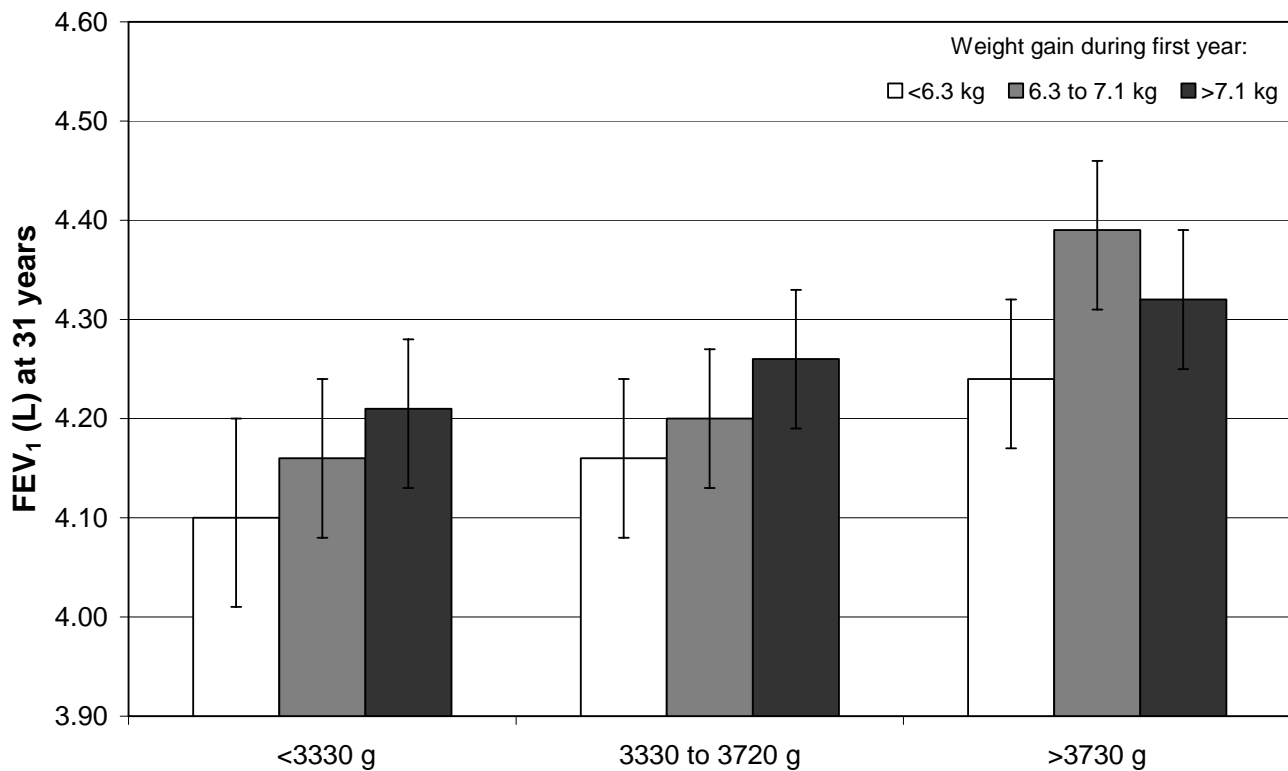

### A. Birth weight in men (N=2262)

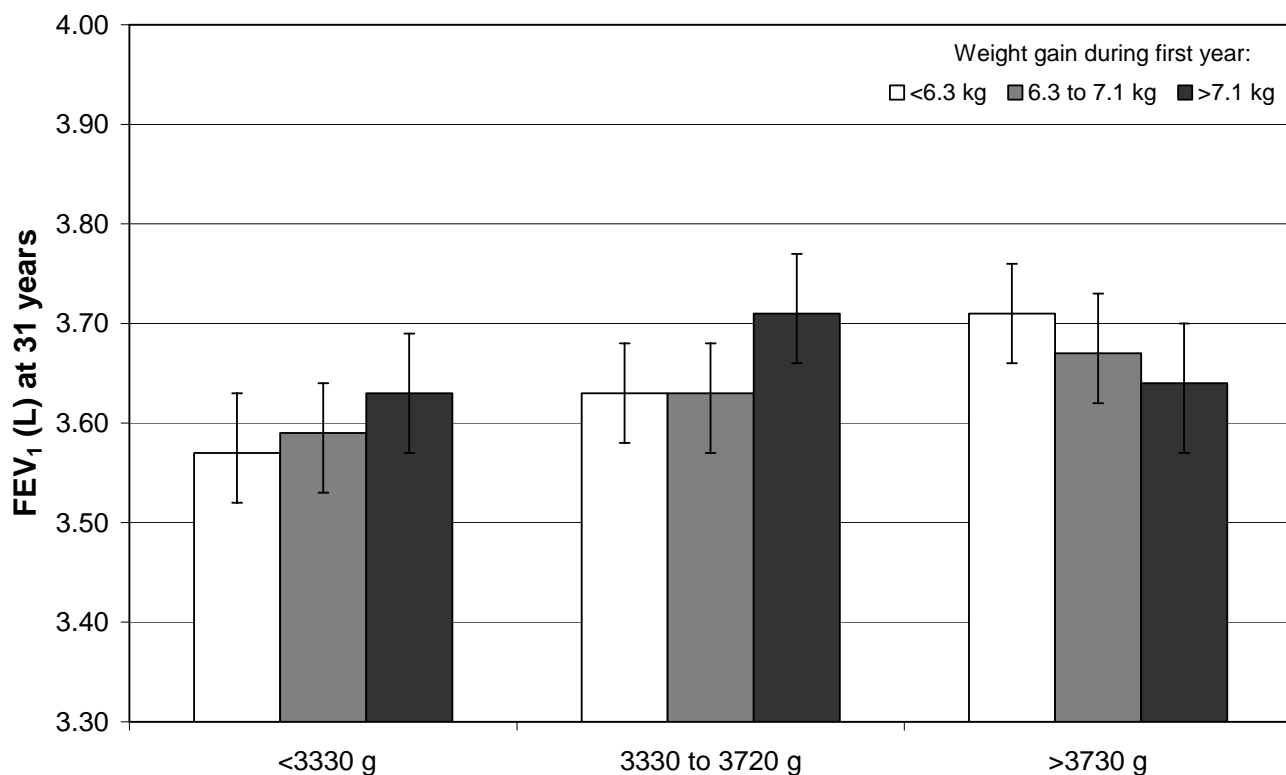

### B. Birth weight in women (N=2295)

Supplement: 625395webonlyfig1.pdf [file 625395webonlyfig1.pdf]
